# Supplementary material
Source: Springer Nature journal article supplement (https://www.springermedizin.de/resource/supplementary/12881_2014_1228_MOESM2_ESM.pdf/9452204)
Supplement: MOESM2 [file 9452204]

**Table S1.** The ten Tag SNPs of the *CH3L1* primers for TaqMan PCR in this study

|        | Tag-SNPs   | Context Sequence [VIC/FAM]                                   | Function class | Position (NCBI36/hg18) | Position (GRCh37) |
|--------|------------|--------------------------------------------------------------|----------------|------------------------|-------------------|
| Block1 | rs903358   | CCTCCTTCCCTCCACTTCAAACCGG[A/C]<br>GTCACAAACCATCAGGCCAATTTGT  |                | 201413762              | 203147139         |
|        | rs7542294  | GTGGATTGCATGAATACGGGTATGT[A/G]<br>GGGCAAATGGTTGACATCCACCTGT  | intron         | 201417799              | 203151176         |
|        | rs946259   | TCCTTTTCCTAAAAAACTGACTAAT[C/T]<br>TTCTCCCCAAACCCATGCACACCCA  | intron         | 201418800              | 203152177         |
|        | rs880633   | AGGGTGGTAAAATGCTGTTTGTCTC[C/T]<br>CCGTCCAGGGTAGAGCCAGGCAAGG  | Exon 5         | 201419424              | 203152801         |
|        | rs12128727 | TGGGCTCTGCTTTCTTTGCTACA[C/T]AT<br>CAGGCAGGCCCTTGACAAACAGG    | intron         | 201420178              | 203153555         |
| Block2 | rs1538372  | GCAGAGCCTGAAGGAGAAGTCTGGG[A/G]<br>TGGGGCCCCGGGCCAGGATTCGGCAA | intron         | 201421155              | 203154532         |
|        | rs10399805 | ATTACCAGAGGAGGGTTGAGAAACC[A/G]<br>CAGAGTTTTGAAAACCTTTGGGTCAG | nearGene5'     | 201422621              | 203155998         |
|        | rs10399931 | CACTAGGGTGATGATGGGGGGCTTC[C/T]<br>GGAGATGTGACTCAGCCGCATTTCC  | nearGene5'     | 201422703              | 203156080         |
| Block3 | rs6691378  | AAGTGGCTTGTCCAGAATCACGCTC[A/G]<br>GTGAATACTAAAGAGGCATCACTTT  | nearGene5'     | 201423745              | 203157122         |
|        | rs946261   | CTCACAAGGGCAGTGTGGAGGAGC[C/T]<br>T]CAGGTAGATGCCATGAATGCAATGA | nearGene5'     | 201424496              | 203157873         |
